# Supplementary material
Source: PubMed Central journal article supplement (PMC4383529)
Supplement: NIHMS672774-supplement-Supplementary_Fig_1.pdf [file NIHMS672774-supplement-Supplementary_Fig_1.pdf]

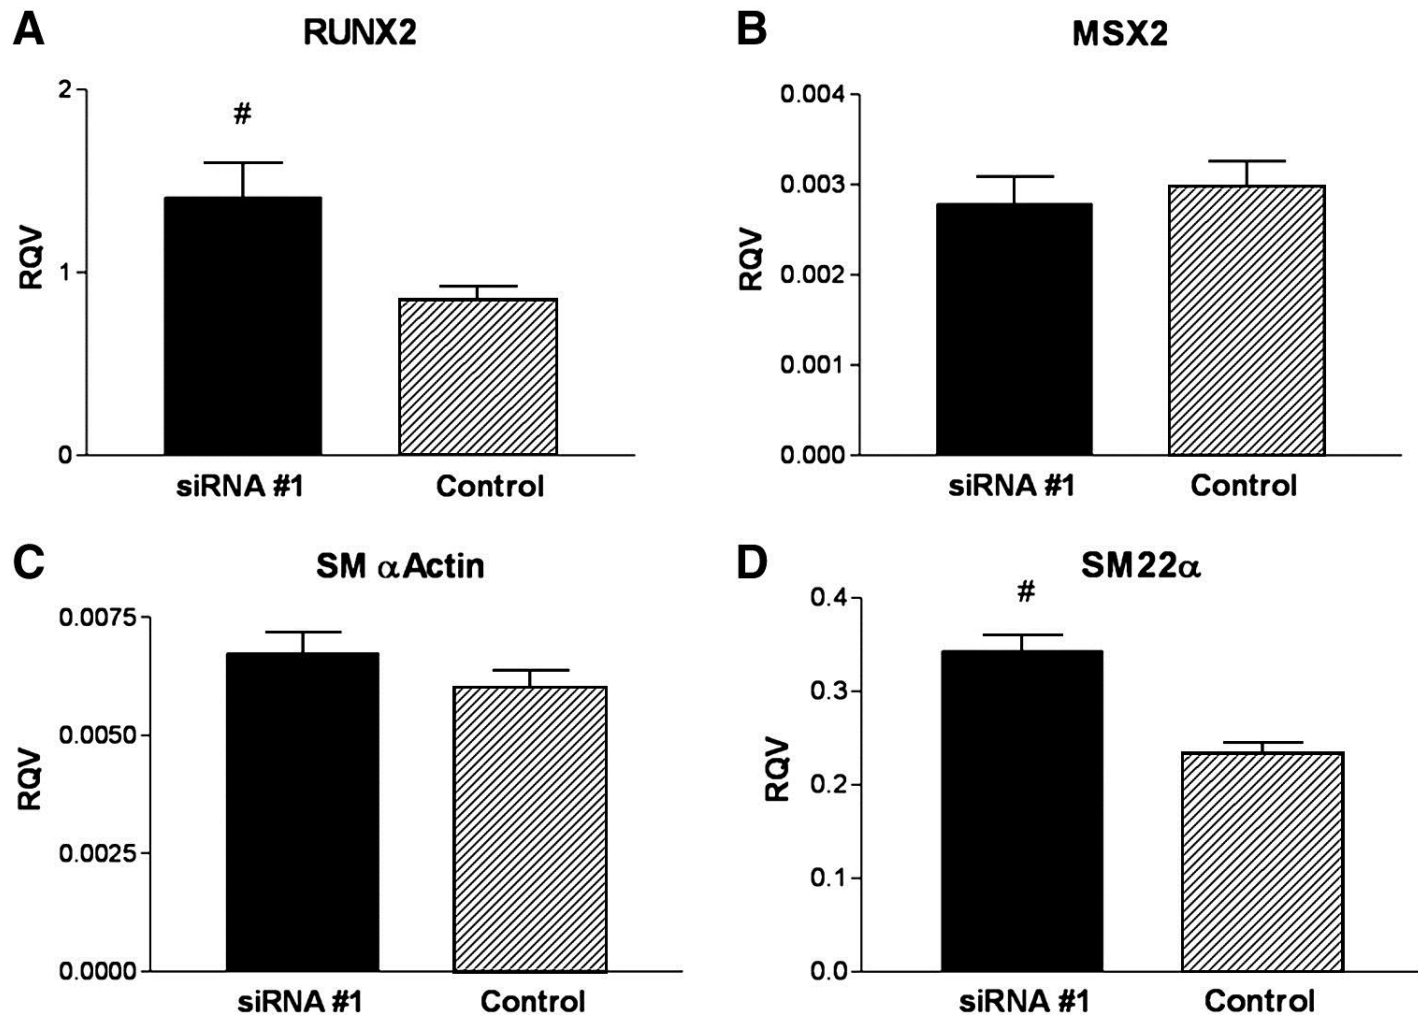

Supplementary Figure 1. Schnurri 3 RNAi resulted in increased RUNX2 and SM22 $\alpha$  expression in cultured VSMCs. Real Time PCR, Relative Quantitative Value (RQV,  $2^{-\Delta\Delta Ct}$ ).  $\Delta Ct$ , normalized to GAPDH. A, RUNX2. B, MSX2. C, SM $\alpha$ Actin. D, SM22 $\alpha$ . n = 6 #p < 0.01. Error bars represent  $\pm$  SE.
